# Supplementary material
Source: PubMed Central journal article supplement (PMC3309764)
Supplement: 1113931109_pnas.201113931SI.pdf [file 1113931109_pnas.201113931SI.pdf]

# Supporting Information

Rosen and Rivera-Collazo 10.1073/pnas.1113931109

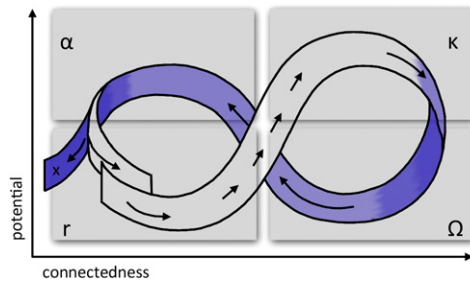

Fig. S1. Theoretical representation of the Adaptive Cycle (reprinted from *Panarchy*, Holling and Gunderson, eds., 2002, Fig. 2-1, pg.34; Copyright © 2002 Island Press. Reproduced by permission of Island Press, Washington DC).

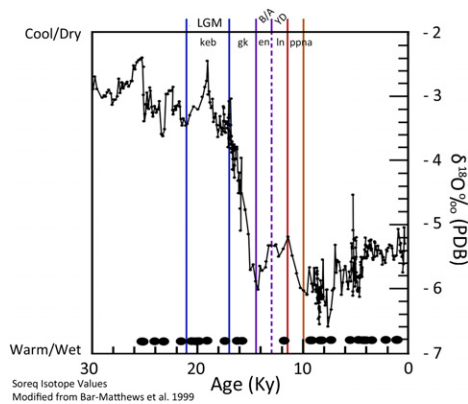

Fig. S2. The  $\delta^{18}O$  sequence from Nahal Soreq Cave, Israel [Modified after Bar-Matthews, 1999 (1)].

1. Bar-Matthews M, Ayalon A, Kaufman A, Wasserburg GJ (1999) The Eastern Mediterranean paleoclimate as a reflection of regional events: Soreq cave, Israel. *Earth Planet Sci Lett* 166: 85–95.

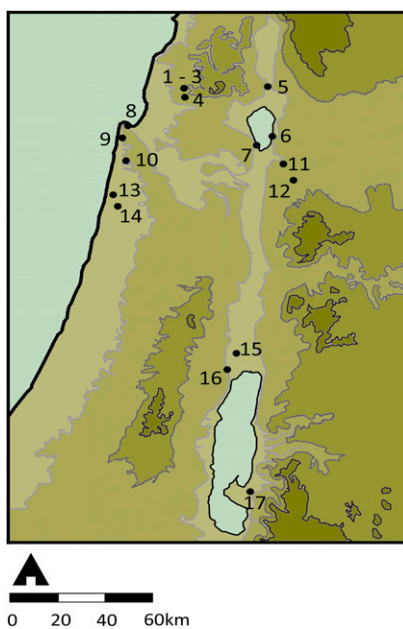

Fig. 53. Map showing sites mentioned in the text: 1, Hayonim Cave; 2, Hayonim Terrace; 3, Meged; 4, Hilazon Tachtit; 5, Eynan; 6, Ein Gev; 7, Ohalo II; 8, Neve David; 9, el-Wad; 10, Kebara Cave; 11, Wadi Hamme; 12, Iraq ed-Dubb; 13, Nahal Hadera V; 14, Hefzibah; 15, Netiv Hagdud; 16, Jericho; 17, Dhra.

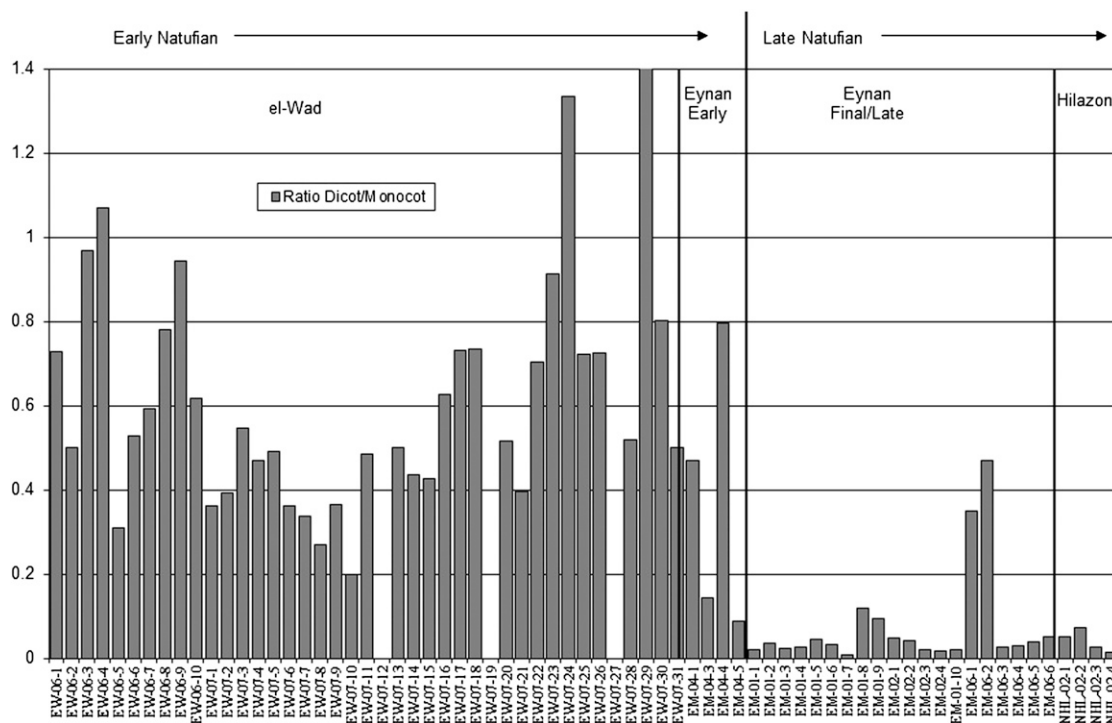

Fig. 54. Graph showing larger proportions of phytoliths from woody dicotyledons at the Early Natufian sites of el-Wad and Eynan and smaller amounts of woody dicotyledons at the Late Natufian sites of Eynan and Hilazon Tachtit [Reproduced from Rosen 2010, Fig. 5 (1)].

1. Rosen AM (2010) Natufian plant exploitation: Managing risk and stability in an environment of change. *Eurasian Prehistory* 7:117–131.

# Frequency of Grass Husk Phytoliths

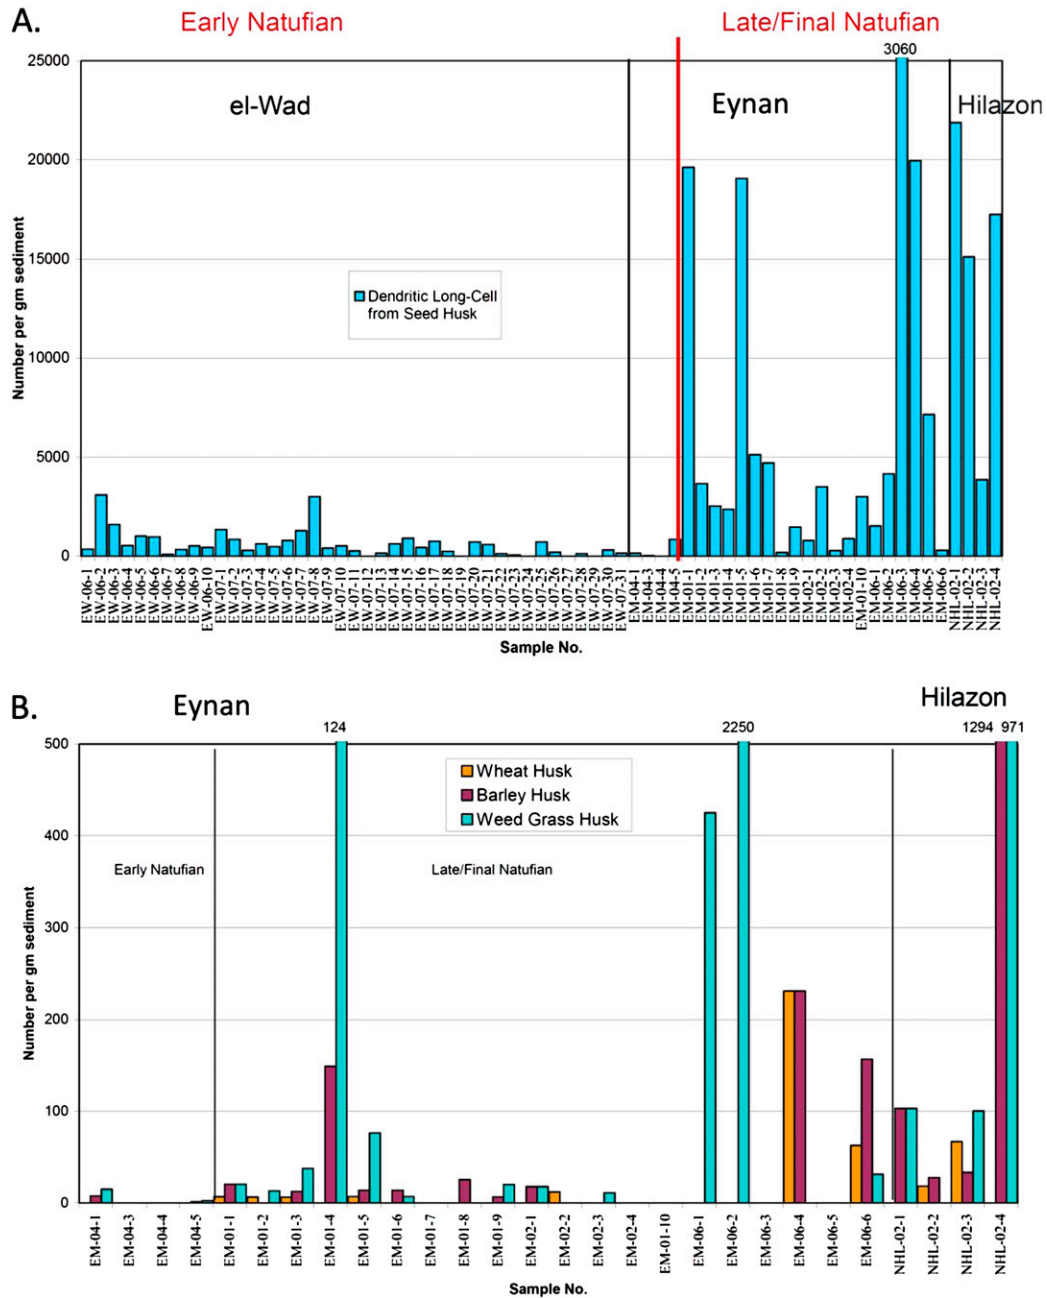

**Fig. 55.** Graphs showing the increase in the use of grass seeds from the Early Natufian to the Late Natufian. (A) Density of grass husk phytoliths from Early Natufian el-Wad and Eynan vs. Late Natufian Eynan and Hilazon Tahtit. (B) Grass phytolith taxa from Eynan and Hilazon Tahtit [Reproduced from Rosen 2010, Figs. 6 and 9 (1)].

1. Rosen AM (2010) Natufian plant exploitation: Managing risk and stability in an environment of change. *Eurasian Prehistory* 7:117–131.
